# Supplementary material for: Exploring a new kind of aromatic hydrogen bond: hydrogen bonding to all-metal aromatic species
Source: Royal Society of Chemistry journal article supplement (doi:10.1039/b507592k), 2005-01-01
Supplement: b507592k.pdf [file b507592k.pdf]

## SUPPORTING INFORMATION FOR:

# Exploring a new kind of aromatic hydrogen bond: hydrogen bonding to all-metal aromatic species

*Xingbang Hu, Haoran Li<sup>a</sup>, Wanchun Liang and Shijun Han*

Department of Chemistry, Zhejiang University, Hangzhou 310027, P. R. China

Supporting Information Available:

- 1.Z-MATRIX of  $Al_4^{2-}$  ... H-Y calculated at B3LYP/6-311++G\*\*, B3LYP/aug-cc-pvdz, MP2/6-311++G\*\* and MP2/aug-cc-pvdz respectively (ANGSTROMS AND DEGREES)
- 2.Z-MATRIX of  $C_6H_6$ ...H-Y calculated at MP2/6-311++G\*\*(ANGSTROMS AND DEGREES)
- 3.Z-MATRIX of  $Al_4Ca$ ...H-Y calculated at MP2/6-311++G\*\*(ANGSTROMS AND DEGREES)
- 4.Z-MATRIX of  $Al_4Mg$ ...H-Y calculated at MP2/6-311++G\*\*(ANGSTROMS AND DEGREES)
- 5.Z-MATRIX of  $Na_2Al_4$ ...H-Y calculated at MP2/6-311++G\*\*(ANGSTROMS AND DEGREES)

1. Z-MATRIX of  $Al_4^{2-}$  ... H-Y calculated at B3LYP/6-311++G\*\*, B3LYP/aug-cc-pvdz, MP2/6-311++G\*\* and MP2/aug-cc-pvdz respectively (ANGSTROMS AND DEGREES)

1) B3LYP/6-311++G\*\*

(A)  $Al_4^{2-}$

|    |   |          |   |           |   |           |
|----|---|----------|---|-----------|---|-----------|
| Al |   |          |   |           |   |           |
| Al | 1 | 2.592974 |   |           |   |           |
| Al | 1 | 2.593011 | 2 | 90.004284 |   |           |
| Al | 3 | 2.592979 | 1 | 89.995721 | 2 | -0.007778 |

(B)  $Al_4^{2-}$ ... $CH_4$

|    |   |          |   |            |   |             |
|----|---|----------|---|------------|---|-------------|
| Al |   |          |   |            |   |             |
| Al | 1 | 2.593165 |   |            |   |             |
| Al | 1 | 2.593008 | 2 | 90.008224  |   |             |
| Al | 3 | 2.592514 | 1 | 89.983758  | 2 | -0.007307   |
| C  | 4 | 5.692881 | 3 | 77.481122  | 1 | -78.152929  |
| H  | 5 | 1.091648 | 4 | 17.051234  | 3 | 42.100551   |
| H  | 5 | 1.092402 | 4 | 124.877178 | 3 | 16.477311   |
| H  | 5 | 1.092713 | 4 | 95.654204  | 3 | -102.298147 |
| H  | 5 | 1.092929 | 4 | 106.106532 | 3 | 145.347867  |

(C)  $Al_4^{2-}$ ... $NH_3$

---

<sup>a</sup> Author to whom correspondence should be addressed. Electronic mail: lihr@zju.edu.cn

# Supplementary Material (ESI) for New Journal of Chemistry

# This journal is © The Royal Society of Chemistry and

# The Centre National de la Recherche Scientifique, 2005

|    |   |          |   |           |   |             |
|----|---|----------|---|-----------|---|-------------|
| Al |   |          |   |           |   |             |
| Al | 1 | 2.591551 |   |           |   |             |
| Al | 1 | 2.591058 | 2 | 89.948382 |   |             |
| Al | 3 | 2.590379 | 1 | 90.047783 | 2 | 0.086784    |
| N  | 3 | 4.477663 | 1 | 78.854757 | 2 | -74.231629  |
| H  | 5 | 1.020447 | 3 | 83.304406 | 1 | 11.496775   |
| H  | 5 | 1.020717 | 3 | 43.381527 | 1 | -105.928142 |
| H  | 5 | 1.020643 | 3 | 70.828561 | 1 | 118.089147  |

(D) Al<sub>4</sub><sup>2-</sup>...H<sub>2</sub>O

|    |   |          |   |           |   |            |
|----|---|----------|---|-----------|---|------------|
| Al |   |          |   |           |   |            |
| Al | 1 | 2.589484 |   |           |   |            |
| Al | 1 | 2.588121 | 2 | 90.192846 |   |            |
| Al | 2 | 2.587997 | 1 | 89.854623 | 3 | -0.088316  |
| O  | 1 | 4.170322 | 2 | 72.177905 | 4 | -81.032601 |
| H  | 5 | 0.969487 | 1 | 38.749495 | 2 | -84.553320 |
| H  | 5 | 0.970845 | 1 | 64.573131 | 2 | 70.664492  |

(E) Al<sub>4</sub><sup>2-</sup>...HF

|    |   |          |   |           |   |            |
|----|---|----------|---|-----------|---|------------|
| Al |   |          |   |           |   |            |
| Al | 1 | 2.585005 |   |           |   |            |
| Al | 1 | 2.585005 | 2 | 90.010466 |   |            |
| Al | 3 | 2.585067 | 1 | 89.991388 | 2 | 0.013629   |
| F  | 1 | 4.079965 | 2 | 71.534942 | 4 | -70.502817 |
| H  | 1 | 3.257659 | 2 | 66.627824 | 4 | -64.408763 |

(F) Al<sub>4</sub><sup>2-</sup>...HCl

|    |   |          |   |           |   |            |
|----|---|----------|---|-----------|---|------------|
| Al |   |          |   |           |   |            |
| Al | 1 | 2.585062 |   |           |   |            |
| Al | 1 | 2.585058 | 2 | 89.999027 |   |            |
| Al | 3 | 2.585061 | 1 | 90.001098 | 2 | 0.000044   |
| Cl | 1 | 4.424854 | 2 | 73.022885 | 4 | -72.219252 |
| H  | 1 | 3.235615 | 2 | 66.461524 | 4 | -64.170577 |

(G) Al<sub>4</sub><sup>2-</sup>...HBr

|    |   |          |   |           |   |            |
|----|---|----------|---|-----------|---|------------|
| Al |   |          |   |           |   |            |
| Al | 1 | 2.584040 |   |           |   |            |
| Al | 1 | 2.584047 | 2 | 90.002916 |   |            |
| Al | 2 | 2.584075 | 1 | 89.998024 | 3 | -0.004811  |
| Br | 1 | 4.325943 | 2 | 72.625985 | 4 | -71.769659 |
| H  | 1 | 2.947268 | 2 | 64.004991 | 4 | -60.819089 |

2) B3LYP/aug-cc-pvdz

(A) Al<sub>4</sub><sup>2-</sup>

|    |   |          |   |           |   |           |
|----|---|----------|---|-----------|---|-----------|
| Al |   |          |   |           |   |           |
| Al | 1 | 2.605691 |   |           |   |           |
| Al | 1 | 2.605692 | 2 | 90.001788 |   |           |
| Al | 2 | 2.605691 | 1 | 89.998227 | 3 | -0.001759 |

(B) Al<sub>4</sub><sup>2-</sup>...CH<sub>4</sub>

|    |   |          |   |           |  |  |
|----|---|----------|---|-----------|--|--|
| Al |   |          |   |           |  |  |
| Al | 1 | 2.607589 |   |           |  |  |
| Al | 1 | 2.606502 | 2 | 90.007741 |  |  |

# Supplementary Material (ESI) for New Journal of Chemistry

# This journal is © The Royal Society of Chemistry and

# The Centre National de la Recherche Scientifique, 2005

|    |   |          |   |            |   |             |
|----|---|----------|---|------------|---|-------------|
| Al | 3 | 2.605219 | 1 | 89.977447  | 2 | 0.021892    |
| C  | 4 | 5.262363 | 3 | 79.292790  | 1 | -88.519167  |
| H  | 5 | 1.097447 | 4 | 13.919243  | 3 | 34.347493   |
| H  | 5 | 1.098649 | 4 | 111.022478 | 3 | 119.756488  |
| H  | 5 | 1.098494 | 4 | 119.774470 | 3 | -9.454789   |
| H  | 5 | 1.098771 | 4 | 96.466704  | 3 | -126.392756 |

(C)  $Al_4^{2-} \dots NH_3$

|    |   |          |   |           |   |             |
|----|---|----------|---|-----------|---|-------------|
| Al |   |          |   |           |   |             |
| Al | 1 | 2.605349 |   |           |   |             |
| Al | 1 | 2.604248 | 2 | 89.947735 |   |             |
| Al | 3 | 2.604298 | 1 | 90.077774 | 2 | 0.031317    |
| N  | 2 | 4.527851 | 1 | 74.179971 | 3 | 73.471926   |
| H  | 5 | 1.023876 | 2 | 54.830986 | 1 | 62.669048   |
| H  | 5 | 1.024095 | 2 | 85.302169 | 1 | -46.196264  |
| H  | 5 | 1.023858 | 2 | 56.123761 | 1 | -154.663110 |

(D)  $Al_4^{2-} \dots H_2O$

|    |   |          |   |           |   |            |
|----|---|----------|---|-----------|---|------------|
| Al |   |          |   |           |   |            |
| Al | 1 | 2.603708 |   |           |   |            |
| Al | 1 | 2.602381 | 2 | 90.108216 |   |            |
| Al | 2 | 2.602021 | 1 | 89.917828 | 3 | -0.192883  |
| O  | 1 | 4.175928 | 2 | 71.882129 | 4 | -80.289208 |
| H  | 5 | 0.971523 | 1 | 38.217775 | 2 | -83.732389 |
| H  | 5 | 0.972873 | 1 | 65.086018 | 2 | 70.806195  |

(E)  $Al_4^{2-} \dots HF$

|    |   |          |   |           |   |            |
|----|---|----------|---|-----------|---|------------|
| Al |   |          |   |           |   |            |
| Al | 1 | 2.599866 |   |           |   |            |
| Al | 1 | 2.599859 | 2 | 90.003044 |   |            |
| Al | 3 | 2.599871 | 1 | 89.997330 | 2 | 0.000088   |
| F  | 3 | 4.090629 | 1 | 71.473330 | 2 | -70.434459 |
| H  | 2 | 3.266948 | 1 | 66.553684 | 3 | 64.308909  |

(F)  $Al_4^{2-} \dots HCl$

|    |   |          |   |           |   |            |
|----|---|----------|---|-----------|---|------------|
| Al |   |          |   |           |   |            |
| Al | 1 | 2.598239 |   |           |   |            |
| Al | 1 | 2.598235 | 2 | 89.999562 |   |            |
| Al | 3 | 2.598239 | 1 | 90.000625 | 2 | 0.000022   |
| Cl | 1 | 4.437644 | 2 | 72.984582 | 4 | -72.175191 |
| H  | 1 | 3.241963 | 2 | 66.383582 | 4 | -64.067515 |

(G)  $Al_4^{2-} \dots HBr$

|    |   |          |   |           |   |            |
|----|---|----------|---|-----------|---|------------|
| Al |   |          |   |           |   |            |
| Al | 1 | 2.596118 |   |           |   |            |
| Al | 1 | 2.596122 | 2 | 90.001560 |   |            |
| Al | 2 | 2.596145 | 1 | 89.999127 | 3 | -0.000265  |
| Br | 1 | 4.323210 | 2 | 72.532379 | 4 | -71.656846 |
| H  | 1 | 2.946614 | 2 | 63.869071 | 4 | -60.621211 |

3) MP2/6-311++G\*\*

(A)  $Al_4^{2-}$

Al

# Supplementary Material (ESI) for New Journal of Chemistry

# This journal is © The Royal Society of Chemistry and

# The Centre National de la Recherche Scientifique, 2005

|    |   |          |   |           |   |          |
|----|---|----------|---|-----------|---|----------|
| Al | 1 | 2.584890 |   |           |   |          |
| Al | 1 | 2.584890 | 2 | 90.002069 |   |          |
| Al | 2 | 2.584890 | 1 | 89.997931 | 3 | 0.000000 |

(B)  $\text{Al}_4^{2-} \dots \text{CH}_4$

|    |   |          |   |            |   |             |
|----|---|----------|---|------------|---|-------------|
| Al |   |          |   |            |   |             |
| Al | 1 | 2.588369 |   |            |   |             |
| Al | 1 | 2.588611 | 2 | 89.970259  |   |             |
| Al | 2 | 2.587908 | 1 | 90.023139  | 3 | -0.033565   |
| C  | 4 | 4.621135 | 2 | 74.453017  | 1 | 75.048230   |
| H  | 5 | 1.090867 | 4 | 22.804708  | 2 | -46.624387  |
| H  | 5 | 1.092948 | 4 | 116.232059 | 2 | 30.179039   |
| H  | 5 | 1.093015 | 4 | 121.690696 | 2 | -108.182313 |
| H  | 5 | 1.092896 | 4 | 86.576248  | 2 | 140.613529  |

(C)  $\text{Al}_4^{2-} \dots \text{NH}_3$

|    |   |          |   |           |   |             |
|----|---|----------|---|-----------|---|-------------|
| Al |   |          |   |           |   |             |
| Al | 1 | 2.588418 |   |           |   |             |
| Al | 1 | 2.591044 | 2 | 90.002899 |   |             |
| Al | 2 | 2.588426 | 1 | 90.055386 | 3 | 0.148763    |
| N  | 2 | 4.096665 | 1 | 74.537104 | 3 | 74.110683   |
| H  | 5 | 1.019493 | 2 | 54.226545 | 1 | 58.180255   |
| H  | 5 | 1.019105 | 2 | 91.843458 | 1 | -47.047091  |
| H  | 5 | 1.019492 | 2 | 54.352778 | 1 | -152.258192 |

(D)  $\text{Al}_4^{2-} \dots \text{H}_2\text{O}$

|    |   |          |   |           |   |            |
|----|---|----------|---|-----------|---|------------|
| Al |   |          |   |           |   |            |
| Al | 1 | 2.585453 |   |           |   |            |
| Al | 1 | 2.585350 | 2 | 90.068482 |   |            |
| Al | 2 | 2.585368 | 1 | 90.029026 | 3 | -0.002084  |
| O  | 1 | 3.872322 | 2 | 70.508134 | 4 | -78.519444 |
| H  | 5 | 0.967007 | 1 | 46.328356 | 2 | -70.223842 |
| H  | 5 | 0.969076 | 1 | 57.857247 | 2 | 77.171384  |

(E)  $\text{Al}_4^{2-} \dots \text{HF}$

|    |   |          |   |           |   |            |
|----|---|----------|---|-----------|---|------------|
| Al |   |          |   |           |   |            |
| Al | 1 | 2.583751 |   |           |   |            |
| Al | 1 | 2.583746 | 2 | 90.000614 |   |            |
| Al | 3 | 2.583748 | 1 | 89.999447 | 2 | -0.001109  |
| F  | 3 | 4.026401 | 1 | 71.287158 | 2 | -70.202043 |
| H  | 3 | 3.220117 | 1 | 66.350866 | 2 | -64.031056 |

(F)  $\text{Al}_4^{2-} \dots \text{HCl}$

|    |   |          |   |           |   |            |
|----|---|----------|---|-----------|---|------------|
| Al |   |          |   |           |   |            |
| Al | 1 | 2.584115 |   |           |   |            |
| Al | 1 | 2.584117 | 2 | 89.996895 |   |            |
| Al | 3 | 2.584116 | 1 | 90.003089 | 2 | -0.000576  |
| Cl | 4 | 4.381238 | 3 | 72.850215 | 1 | -72.028277 |
| H  | 4 | 3.239761 | 3 | 66.498068 | 1 | -64.226626 |

(G)  $\text{Al}_4^{2-} \dots \text{HBr}$

|    |   |          |  |  |  |  |
|----|---|----------|--|--|--|--|
| Al |   |          |  |  |  |  |
| Al | 1 | 2.583327 |  |  |  |  |

# Supplementary Material (ESI) for New Journal of Chemistry

# This journal is © The Royal Society of Chemistry and

# The Centre National de la Recherche Scientifique, 2005

|    |   |          |   |           |   |           |
|----|---|----------|---|-----------|---|-----------|
| Al | 1 | 2.583326 | 2 | 89.996313 |   |           |
| Al | 2 | 2.583326 | 1 | 90.003687 | 3 | 0.000710  |
| Br | 4 | 4.397561 | 2 | 72.926808 | 1 | 72.111613 |
| H  | 4 | 3.124391 | 2 | 65.588096 | 1 | 63.006013 |

4) MP2/aug-cc-pvdz

(A)  $\text{Al}_4^{2-}$

|    |   |          |   |           |   |           |
|----|---|----------|---|-----------|---|-----------|
| Al |   |          |   |           |   |           |
| Al | 1 | 2.630295 |   |           |   |           |
| Al | 1 | 2.630295 | 2 | 90.000000 |   |           |
| Al | 2 | 2.630280 | 1 | 90.000000 | 3 | -0.002004 |

(B)  $\text{Al}_4^{2-} \dots \text{CH}_4$

|    |   |          |   |            |   |             |
|----|---|----------|---|------------|---|-------------|
| Al |   |          |   |            |   |             |
| Al | 1 | 2.631546 |   |            |   |             |
| Al | 1 | 2.631515 | 2 | 89.996342  |   |             |
| Al | 2 | 2.631454 | 1 | 90.004638  | 3 | -0.002656   |
| C  | 4 | 4.730953 | 2 | 73.894340  | 1 | 73.315986   |
| H  | 5 | 1.099265 | 4 | 22.927862  | 2 | -48.633343  |
| H  | 5 | 1.100800 | 4 | 116.179307 | 2 | 28.602677   |
| H  | 5 | 1.100840 | 4 | 122.008242 | 2 | -110.001151 |
| H  | 5 | 1.100818 | 4 | 86.530954  | 2 | 138.870213  |

(C)  $\text{Al}_4^{2-} \dots \text{NH}_3$

|    |   |          |   |           |   |             |
|----|---|----------|---|-----------|---|-------------|
| Al |   |          |   |           |   |             |
| Al | 1 | 2.632660 |   |           |   |             |
| Al | 1 | 2.633636 | 2 | 90.016599 |   |             |
| Al | 2 | 2.632617 | 1 | 90.004636 | 3 | 0.079046    |
| N  | 2 | 4.106864 | 1 | 73.221817 | 3 | 72.549602   |
| H  | 5 | 1.027292 | 2 | 54.601638 | 1 | 60.427219   |
| H  | 5 | 1.027468 | 2 | 85.237384 | 1 | -47.430749  |
| H  | 5 | 1.027275 | 2 | 54.688285 | 1 | -155.259343 |

(D)  $\text{Al}_4^{2-} \dots \text{H}_2\text{O}$

|    |   |          |   |           |   |            |
|----|---|----------|---|-----------|---|------------|
| Al |   |          |   |           |   |            |
| Al | 1 | 2.632309 |   |           |   |            |
| Al | 1 | 2.632079 | 2 | 90.029888 |   |            |
| Al | 2 | 2.632207 | 1 | 89.986374 | 3 | -0.135501  |
| O  | 2 | 4.013240 | 1 | 70.949820 | 3 | 72.737582  |
| H  | 5 | 0.973826 | 2 | 40.953279 | 1 | 61.300965  |
| H  | 5 | 0.974998 | 2 | 64.480719 | 1 | -83.372150 |

(E)  $\text{Al}_4^{2-} \dots \text{HF}$

|    |   |          |   |           |   |            |
|----|---|----------|---|-----------|---|------------|
| Al |   |          |   |           |   |            |
| Al | 1 | 2.629394 |   |           |   |            |
| Al | 1 | 2.629394 | 2 | 89.995010 |   |            |
| Al | 3 | 2.629394 | 1 | 90.005339 | 2 | -0.001983  |
| F  | 2 | 4.006151 | 1 | 70.856608 | 3 | 69.685209  |
| H  | 3 | 3.197747 | 1 | 65.739457 | 2 | -63.201061 |

(F)  $\text{Al}_4^{2-} \dots \text{HCl}$

|    |   |          |  |  |  |  |
|----|---|----------|--|--|--|--|
| Al |   |          |  |  |  |  |
| Al | 1 | 2.629374 |  |  |  |  |

# Supplementary Material (ESI) for New Journal of Chemistry

# This journal is © The Royal Society of Chemistry and

# The Centre National de la Recherche Scientifique, 2005

|    |   |          |   |           |   |            |
|----|---|----------|---|-----------|---|------------|
| Al | 1 | 2.629375 | 2 | 90.000986 |   |            |
| Al | 3 | 2.629376 | 1 | 89.999029 | 2 | 0.000261   |
| Cl | 1 | 4.246374 | 2 | 71.965645 | 4 | -70.999486 |
| H  | 1 | 3.100009 | 2 | 64.907836 | 4 | -62.078555 |

(G) Al<sub>4</sub><sup>2-</sup>...HBr

|    |   |          |   |           |   |            |
|----|---|----------|---|-----------|---|------------|
| Al |   |          |   |           |   |            |
| Al | 1 | 2.628808 |   |           |   |            |
| Al | 1 | 2.628809 | 2 | 90.001536 |   |            |
| Al | 2 | 2.628811 | 1 | 89.998542 | 3 | -0.000394  |
| Br | 1 | 4.255034 | 2 | 72.008978 | 4 | -71.050483 |
| H  | 1 | 2.981765 | 2 | 63.846732 | 4 | -60.590949 |

2.Z-MATRIX of C<sub>6</sub>H<sub>6</sub>...H-Y calculated at MP2/6-311++G\*\*(ANGSTROMS AND DEGREES)

(A) C<sub>6</sub>H<sub>6</sub>

|   |   |          |   |            |   |             |
|---|---|----------|---|------------|---|-------------|
| C |   |          |   |            |   |             |
| C | 1 | 1.400315 |   |            |   |             |
| C | 2 | 1.400313 | 1 | 119.975840 |   |             |
| C | 3 | 1.400314 | 2 | 119.975767 | 1 | 3.093631    |
| C | 4 | 1.400312 | 3 | 119.975890 | 2 | -3.098455   |
| C | 5 | 1.400312 | 4 | 119.975692 | 3 | 3.103557    |
| H | 1 | 1.086737 | 2 | 119.983438 | 3 | 179.659512  |
| H | 2 | 1.086737 | 1 | 119.983515 | 6 | 179.657816  |
| H | 3 | 1.086738 | 2 | 119.983430 | 1 | -179.661148 |
| H | 4 | 1.086737 | 3 | 119.983370 | 2 | 179.655067  |
| H | 5 | 1.086737 | 4 | 119.983474 | 3 | -179.652069 |
| H | 6 | 1.086738 | 5 | 119.983361 | 4 | 179.650788  |

(B) C<sub>6</sub>H<sub>6</sub>...CH<sub>4</sub>

|   |    |          |   |            |   |             |
|---|----|----------|---|------------|---|-------------|
| C |    |          |   |            |   |             |
| C | 1  | 2.425646 |   |            |   |             |
| C | 1  | 2.425645 | 2 | 60.000297  |   |             |
| C | 2  | 1.400450 | 1 | 89.999636  | 3 | 0.009219    |
| C | 1  | 1.400447 | 2 | 30.000008  | 4 | -179.970870 |
| C | 1  | 1.400445 | 2 | 90.000294  | 5 | 179.970134  |
| H | 1  | 1.086821 | 2 | 149.999691 | 5 | 0.144687    |
| H | 2  | 1.086821 | 1 | 149.999858 | 6 | 179.822300  |
| H | 3  | 1.086823 | 1 | 149.999789 | 2 | -179.832256 |
| H | 4  | 1.086852 | 2 | 119.999809 | 1 | 179.952614  |
| H | 5  | 1.086854 | 1 | 120.000175 | 2 | 179.970881  |
| H | 6  | 1.086854 | 1 | 120.000178 | 2 | -179.953698 |
| C | 1  | 3.922762 | 2 | 71.990983  | 5 | -100.838157 |
| H | 13 | 1.091081 | 1 | 88.608355  | 2 | 148.280496  |
| H | 13 | 1.091082 | 1 | 118.730936 | 2 | -100.270624 |
| H | 13 | 1.091082 | 1 | 118.730932 | 2 | 36.831725   |
| H | 13 | 1.089623 | 1 | 20.929947  | 2 | -31.719478  |

(C) C<sub>6</sub>H<sub>6</sub>...NH<sub>3</sub>

|   |   |          |   |           |   |            |
|---|---|----------|---|-----------|---|------------|
| C |   |          |   |           |   |            |
| C | 1 | 2.802351 |   |           |   |            |
| C | 2 | 1.400656 | 1 | 59.989987 |   |            |
| C | 2 | 1.400672 | 1 | 59.990150 | 3 | 179.861166 |
| C | 1 | 1.400826 | 2 | 59.981092 | 3 | 0.054845   |

# Supplementary Material (ESI) for New Journal of Chemistry

# This journal is © The Royal Society of Chemistry and

# The Centre National de la Recherche Scientifique, 2005

|   |    |          |   |            |   |             |
|---|----|----------|---|------------|---|-------------|
| C | 1  | 1.400815 | 2 | 59.981351  | 3 | -179.915863 |
| H | 1  | 1.086829 | 6 | 120.018097 | 4 | 179.843056  |
| H | 2  | 1.086423 | 3 | 120.008121 | 5 | -179.613042 |
| H | 3  | 1.086703 | 2 | 119.959401 | 1 | -179.975950 |
| H | 4  | 1.086700 | 2 | 119.959553 | 1 | 179.975667  |
| H | 5  | 1.086880 | 1 | 119.992110 | 2 | 179.774790  |
| H | 6  | 1.086882 | 1 | 119.992003 | 2 | -179.774477 |
| N | 2  | 3.619470 | 1 | 73.559213  | 6 | -89.984099  |
| H | 13 | 1.015020 | 2 | 23.064630  | 1 | -0.000992   |
| H | 13 | 1.014383 | 2 | 118.097405 | 1 | 65.586663   |
| H | 13 | 1.014383 | 2 | 118.103614 | 1 | -65.571075  |

(D) C<sub>6</sub>H<sub>6</sub>...H<sub>2</sub>O

|   |    |          |   |            |   |             |
|---|----|----------|---|------------|---|-------------|
| C |    |          |   |            |   |             |
| C | 1  | 1.401125 |   |            |   |             |
| C | 1  | 1.401130 | 2 | 120.021728 |   |             |
| C | 2  | 1.400923 | 1 | 119.998113 | 3 | 0.466379    |
| C | 3  | 1.400916 | 1 | 119.999124 | 2 | -0.468014   |
| C | 5  | 1.401521 | 3 | 119.985748 | 1 | 0.362400    |
| H | 1  | 1.086884 | 2 | 119.992245 | 4 | -179.480594 |
| H | 2  | 1.086670 | 1 | 120.037332 | 3 | 179.866644  |
| H | 3  | 1.086665 | 1 | 120.036815 | 2 | -179.865015 |
| H | 4  | 1.086492 | 2 | 120.029624 | 1 | 179.949200  |
| H | 5  | 1.086497 | 3 | 120.029315 | 1 | -179.946916 |
| H | 6  | 1.086595 | 5 | 119.998531 | 3 | 179.962803  |
| O | 6  | 3.552474 | 5 | 80.377207  | 3 | 72.669100   |
| H | 13 | 0.962299 | 6 | 9.112609   | 5 | -61.452397  |
| H | 13 | 0.959846 | 6 | 111.709269 | 5 | -61.463089  |

(E) C<sub>6</sub>H<sub>6</sub>...HF

|   |   |          |   |            |   |             |
|---|---|----------|---|------------|---|-------------|
| C |   |          |   |            |   |             |
| C | 1 | 2.803230 |   |            |   |             |
| C | 1 | 1.401905 | 2 | 60.028015  |   |             |
| C | 2 | 1.400974 | 1 | 59.967787  | 3 | 179.958058  |
| C | 2 | 1.401905 | 1 | 60.028015  | 3 | 0.000000    |
| C | 4 | 1.400892 | 2 | 120.032213 | 1 | 0.000000    |
| H | 1 | 1.086442 | 6 | 120.051664 | 4 | 179.872235  |
| H | 2 | 1.086442 | 4 | 120.051664 | 6 | -179.872235 |
| H | 3 | 1.086577 | 1 | 120.040274 | 2 | 179.998421  |
| H | 4 | 1.086411 | 2 | 119.962637 | 1 | 179.781887  |
| H | 5 | 1.086577 | 2 | 120.040274 | 1 | -179.998421 |
| H | 6 | 1.086411 | 4 | 120.004790 | 2 | 179.781794  |
| H | 3 | 2.506000 | 1 | 83.238076  | 2 | 66.816898   |
| F | 3 | 3.369732 | 1 | 84.868796  | 2 | 72.963395   |

(F) C<sub>6</sub>H<sub>6</sub>...HCl

|   |   |          |   |            |   |            |
|---|---|----------|---|------------|---|------------|
| C |   |          |   |            |   |            |
| C | 1 | 2.802535 |   |            |   |            |
| C | 1 | 1.401401 | 2 | 60.012491  |   |            |
| C | 2 | 1.401009 | 1 | 59.984716  | 3 | 179.996954 |
| C | 2 | 1.401401 | 1 | 60.012399  | 3 | 0.000093   |
| C | 4 | 1.400881 | 2 | 120.015323 | 1 | 0.000096   |
| H | 1 | 1.086542 | 6 | 120.019623 | 4 | 179.983596 |

# Supplementary Material (ESI) for New Journal of Chemistry

# This journal is © The Royal Society of Chemistry and

# The Centre National de la Recherche Scientifique, 2005

|    |   |          |   |            |   |             |
|----|---|----------|---|------------|---|-------------|
| H  | 2 | 1.086542 | 4 | 120.019833 | 6 | -179.982738 |
| H  | 3 | 1.086626 | 1 | 120.019188 | 2 | 179.989392  |
| H  | 4 | 1.086488 | 2 | 119.986238 | 1 | 179.987422  |
| H  | 5 | 1.086626 | 2 | 120.019099 | 1 | -179.989055 |
| H  | 6 | 1.086488 | 4 | 119.998087 | 2 | 179.987657  |
| Cl | 5 | 3.830861 | 2 | 80.190502  | 1 | -71.692169  |
| H  | 5 | 2.620184 | 2 | 78.478910  | 1 | -64.355501  |

(G) C<sub>6</sub>H<sub>6</sub>...HBr

|    |   |          |   |            |   |             |
|----|---|----------|---|------------|---|-------------|
| C  |   |          |   |            |   |             |
| C  | 1 | 2.802340 |   |            |   |             |
| C  | 1 | 1.401289 | 2 | 60.011067  |   |             |
| C  | 2 | 1.400938 | 1 | 59.986683  | 3 | -179.990252 |
| C  | 2 | 1.401291 | 1 | 60.011016  | 3 | 0.000142    |
| C  | 4 | 1.400839 | 2 | 120.013437 | 1 | 0.000285    |
| H  | 1 | 1.086603 | 6 | 120.017472 | 4 | 179.969149  |
| H  | 2 | 1.086603 | 4 | 120.017728 | 6 | -179.968338 |
| H  | 3 | 1.086684 | 1 | 120.017382 | 2 | 179.964914  |
| H  | 4 | 1.086551 | 2 | 119.989260 | 1 | 179.982080  |
| H  | 5 | 1.086685 | 2 | 120.017477 | 1 | -179.964346 |
| H  | 6 | 1.086551 | 4 | 119.997159 | 2 | 179.982624  |
| Br | 5 | 3.987867 | 2 | 80.213468  | 1 | -72.216599  |
| H  | 5 | 2.643282 | 2 | 78.315162  | 1 | -64.410967  |

3.Z-MATRIX of Al<sub>4</sub>Ca...H-Y calculated at MP2/6-311++G\*\* (ANGSTROMS AND DEGREES)

(A) Al<sub>4</sub>Ca

|    |   |          |   |           |   |           |
|----|---|----------|---|-----------|---|-----------|
| Al |   |          |   |           |   |           |
| Al | 1 | 2.621070 |   |           |   |           |
| Al | 1 | 2.621080 | 2 | 89.998486 |   |           |
| Al | 2 | 2.621070 | 1 | 90.001730 | 3 | 0.000656  |
| Ca | 2 | 3.047822 | 1 | 64.534456 | 3 | 61.558863 |

(B) Al<sub>4</sub>Ca...CH<sub>4</sub>

|    |   |          |   |            |   |             |
|----|---|----------|---|------------|---|-------------|
| Al |   |          |   |            |   |             |
| Al | 1 | 2.622535 |   |            |   |             |
| Al | 1 | 2.622553 | 2 | 89.991610  |   |             |
| Al | 3 | 2.622984 | 1 | 90.017913  | 2 | -0.026447   |
| Ca | 4 | 3.044781 | 3 | 64.585020  | 1 | -61.618621  |
| C  | 1 | 4.481061 | 2 | 75.107666  | 4 | 74.600165   |
| H  | 6 | 1.091159 | 1 | 84.437105  | 2 | 132.811056  |
| H  | 6 | 1.090277 | 1 | 24.921852  | 2 | -47.197829  |
| H  | 6 | 1.091172 | 1 | 119.950705 | 2 | -117.745824 |
| H  | 6 | 1.091173 | 1 | 119.940135 | 2 | 23.369340   |

(C) Al<sub>4</sub>Ca...NH<sub>3</sub>

|    |   |          |   |           |   |            |
|----|---|----------|---|-----------|---|------------|
| Al |   |          |   |           |   |            |
| Al | 1 | 2.621338 |   |           |   |            |
| Al | 1 | 2.621322 | 2 | 89.991116 |   |            |
| Al | 2 | 2.621358 | 1 | 90.009419 | 3 | -0.052503  |
| Ca | 2 | 3.044021 | 1 | 64.698093 | 3 | 61.725206  |
| N  | 3 | 4.024255 | 1 | 77.538868 | 2 | 77.489364  |
| H  | 6 | 1.014960 | 3 | 57.541082 | 1 | 61.599598  |
| H  | 6 | 1.014769 | 3 | 93.362402 | 1 | -46.301161 |



# Supplementary Material (ESI) for New Journal of Chemistry

# This journal is © The Royal Society of Chemistry and

# The Centre National de la Recherche Scientifique, 2005

|   |   |          |   |           |   |             |
|---|---|----------|---|-----------|---|-------------|
| H | 6 | 1.014957 | 3 | 57.631509 | 1 | -154.185705 |
|---|---|----------|---|-----------|---|-------------|

(D) Al<sub>4</sub>Ca...H<sub>2</sub>O

|    |   |          |   |            |   |            |
|----|---|----------|---|------------|---|------------|
| Al |   |          |   |            |   |            |
| Al | 1 | 2.625599 |   |            |   |            |
| Al | 1 | 2.629529 | 2 | 89.988202  |   |            |
| Al | 3 | 2.625557 | 1 | 89.999533  | 2 | 0.000470   |
| Ca | 3 | 3.035381 | 1 | 64.336425  | 2 | -61.848036 |
| O  | 4 | 3.940804 | 3 | 73.654375  | 1 | 69.693747  |
| H  | 6 | 0.962782 | 4 | 32.785719  | 3 | -39.438945 |
| H  | 6 | 0.961124 | 4 | 127.177662 | 3 | 9.425782   |

(E) Al<sub>4</sub>Ca...HF

|    |   |          |   |           |   |            |
|----|---|----------|---|-----------|---|------------|
| Al |   |          |   |           |   |            |
| Al | 1 | 2.630068 |   |           |   |            |
| Al | 1 | 2.630033 | 2 | 90.007309 |   |            |
| Al | 3 | 2.630353 | 1 | 90.000760 | 2 | 0.000452   |
| Ca | 1 | 3.041568 | 2 | 64.385553 | 4 | -61.350709 |
| F  | 1 | 3.935014 | 2 | 70.572192 | 4 | 69.306355  |
| H  | 1 | 3.152671 | 2 | 65.423548 | 4 | 62.749689  |

(F) Al<sub>4</sub>Ca...HCl

|    |   |          |   |           |   |            |
|----|---|----------|---|-----------|---|------------|
| Al |   |          |   |           |   |            |
| Al | 1 | 2.627426 |   |           |   |            |
| Al | 1 | 2.627413 | 2 | 90.007683 |   |            |
| Al | 3 | 2.627585 | 1 | 89.996558 | 2 | 0.001417   |
| Ca | 4 | 3.043314 | 3 | 64.455507 | 1 | -61.444404 |
| Cl | 4 | 4.354371 | 3 | 72.458199 | 1 | 71.566386  |
| H  | 1 | 3.242911 | 2 | 66.116535 | 4 | 63.709702  |

(G) Al<sub>4</sub>Ca...HBr

|    |   |          |   |           |   |            |
|----|---|----------|---|-----------|---|------------|
| Al |   |          |   |           |   |            |
| Al | 1 | 2.627687 |   |           |   |            |
| Al | 1 | 2.627739 | 2 | 89.993966 |   |            |
| Al | 2 | 2.627391 | 1 | 90.000599 | 3 | -0.000022  |
| Ca | 1 | 3.044951 | 2 | 64.465585 | 4 | -61.458660 |
| Br | 2 | 4.431149 | 1 | 72.753143 | 3 | -71.920669 |
| H  | 1 | 3.185825 | 2 | 65.961407 | 4 | 63.414026  |

4.Z-MATRIX of Al<sub>4</sub>Mg...H-Y calculated at MP2/6-311++G\*\*(ANGSTROMS AND DEGREES)

(A) Al<sub>4</sub>Mg

|    |   |          |   |           |   |           |
|----|---|----------|---|-----------|---|-----------|
| Al |   |          |   |           |   |           |
| Al | 1 | 2.666822 |   |           |   |           |
| Al | 1 | 2.665813 | 2 | 90.015326 |   |           |
| Al | 3 | 2.666592 | 1 | 90.023454 | 2 | -0.001519 |
| Mg | 2 | 2.793357 | 1 | 61.644358 | 3 | 57.178005 |

(B) Al<sub>4</sub>Mg...CH<sub>4</sub>

|    |   |          |   |           |   |            |
|----|---|----------|---|-----------|---|------------|
| Al |   |          |   |           |   |            |
| Al | 1 | 2.662655 |   |           |   |            |
| Al | 1 | 2.668664 | 2 | 90.075501 |   |            |
| Al | 2 | 2.668684 | 1 | 90.079661 | 3 | 0.001513   |
| Mg | 3 | 2.786769 | 1 | 62.054353 | 2 | -57.214268 |

# Supplementary Material (ESI) for New Journal of Chemistry

# This journal is © The Royal Society of Chemistry and

# The Centre National de la Recherche Scientifique, 2005

|   |   |          |   |            |   |             |
|---|---|----------|---|------------|---|-------------|
| C | 1 | 4.004120 | 2 | 70.586012  | 4 | 96.000668   |
| H | 6 | 1.091283 | 1 | 61.845680  | 2 | 142.433950  |
| H | 6 | 1.090976 | 1 | 58.948067  | 2 | -77.760669  |
| H | 6 | 1.091078 | 1 | 156.362141 | 2 | -143.715725 |
| H | 6 | 1.091283 | 1 | 94.079366  | 2 | 32.567821   |

(C) Al<sub>4</sub>Mg...NH<sub>3</sub>

|    |   |          |   |           |   |             |
|----|---|----------|---|-----------|---|-------------|
| Al |   |          |   |           |   |             |
| Al | 1 | 2.668217 |   |           |   |             |
| Al | 1 | 2.661064 | 2 | 90.097000 |   |             |
| Al | 3 | 2.661131 | 1 | 90.057541 | 2 | 0.019760    |
| Mg | 2 | 2.768805 | 1 | 62.052797 | 3 | 58.079712   |
| N  | 3 | 3.893400 | 1 | 79.676436 | 2 | 79.648578   |
| H  | 6 | 1.014562 | 3 | 58.824958 | 1 | 63.610774   |
| H  | 6 | 1.014123 | 3 | 91.583753 | 1 | -45.963276  |
| H  | 6 | 1.014560 | 3 | 58.954500 | 1 | -155.511382 |

(D) Al<sub>4</sub>Mg...H<sub>2</sub>O

|    |   |          |   |           |   |            |
|----|---|----------|---|-----------|---|------------|
| Al |   |          |   |           |   |            |
| Al | 1 | 2.670190 |   |           |   |            |
| Al | 1 | 2.665110 | 2 | 90.065968 |   |            |
| Al | 2 | 2.663272 | 1 | 90.267948 | 3 | 0.158187   |
| O  | 1 | 3.744916 | 2 | 71.071305 | 4 | -92.656197 |
| H  | 5 | 0.961950 | 1 | 51.623561 | 2 | -64.178761 |
| H  | 5 | 0.960911 | 1 | 63.182707 | 2 | 72.068614  |
| Mg | 3 | 2.761477 | 1 | 63.046830 | 2 | 56.858482  |

(E) Al<sub>4</sub>Mg...HF

|    |   |          |   |           |   |           |
|----|---|----------|---|-----------|---|-----------|
| Al |   |          |   |           |   |           |
| Al | 1 | 2.686841 |   |           |   |           |
| Al | 1 | 2.687178 | 2 | 90.007745 |   |           |
| Al | 2 | 2.687202 | 1 | 90.007158 | 3 | -0.000034 |
| Mg | 4 | 2.783294 | 2 | 61.190309 | 1 | 56.574463 |
| F  | 1 | 3.841336 | 2 | 69.598290 | 4 | 68.124925 |
| H  | 1 | 3.074286 | 2 | 64.131573 | 4 | 60.957448 |

(F) Al<sub>4</sub>Mg...HCl

|    |   |          |   |           |   |            |
|----|---|----------|---|-----------|---|------------|
| Al |   |          |   |           |   |            |
| Al | 1 | 2.679275 |   |           |   |            |
| Al | 1 | 2.679425 | 2 | 89.976762 |   |            |
| Al | 2 | 2.678171 | 1 | 90.002760 | 3 | -0.000602  |
| Mg | 1 | 2.788206 | 2 | 61.375671 | 4 | -56.909742 |
| Cl | 1 | 4.271991 | 2 | 71.777377 | 4 | 70.762371  |
| H  | 1 | 3.173880 | 2 | 65.129327 | 4 | 62.356091  |

(G) Al<sub>4</sub>Mg...HBr

|    |   |          |   |           |   |            |
|----|---|----------|---|-----------|---|------------|
| Al |   |          |   |           |   |            |
| Al | 1 | 2.678287 |   |           |   |            |
| Al | 1 | 2.678296 | 2 | 90.003217 |   |            |
| Al | 2 | 2.678444 | 1 | 90.000491 | 3 | -0.000062  |
| Mg | 1 | 2.794225 | 2 | 61.373566 | 4 | -56.909205 |
| Br | 4 | 4.296310 | 2 | 72.112521 | 1 | -71.302306 |
| H  | 1 | 3.092473 | 2 | 64.473063 | 4 | 61.429922  |

# Supplementary Material (ESI) for New Journal of Chemistry  
 # This journal is © The Royal Society of Chemistry and  
 # The Centre National de la Recherche Scientifique, 2005

5.Z-MATRIX of Na<sub>2</sub>Al<sub>4</sub>...H-Y calculated at MP2/6-311++G\*\*(ANGSTROMS AND DEGREES)

(A) Na<sub>2</sub>Al<sub>4</sub>

|    |   |          |   |            |   |           |
|----|---|----------|---|------------|---|-----------|
| Al |   |          |   |            |   |           |
| Al | 1 | 2.636040 |   |            |   |           |
| Al | 1 | 2.545887 | 2 | 89.965485  |   |           |
| Al | 2 | 2.545884 | 1 | 89.964258  | 3 | 0.000121  |
| Na | 3 | 3.188977 | 1 | 66.639593  | 2 | 63.261111 |
| Na | 4 | 3.038575 | 2 | 154.240087 | 1 | 5.388746  |

(B) Na<sub>2</sub>Al<sub>4</sub>...CH<sub>4</sub>

|    |   |          |   |            |   |            |
|----|---|----------|---|------------|---|------------|
| Al |   |          |   |            |   |            |
| Al | 1 | 2.550430 |   |            |   |            |
| Al | 1 | 2.638638 | 2 | 89.621628  |   |            |
| Al | 3 | 2.548337 | 1 | 90.203703  | 2 | -0.816884  |
| Na | 4 | 3.149989 | 3 | 66.208402  | 1 | -62.814742 |
| Na | 2 | 3.029985 | 1 | 154.887351 | 3 | 0.152961   |
| C  | 4 | 4.440568 | 3 | 74.537318  | 1 | 74.537227  |
| H  | 7 | 1.120006 | 4 | 23.323849  | 3 | -47.445635 |
| H  | 7 | 1.091684 | 4 | 93.326159  | 3 | 178.238835 |
| H  | 7 | 1.091315 | 4 | 100.315880 | 3 | 67.496591  |
| H  | 7 | 1.091336 | 4 | 131.963296 | 3 | -61.340190 |

(C) Na<sub>2</sub>Al<sub>4</sub>...NH<sub>3</sub>

|    |   |          |   |           |   |             |
|----|---|----------|---|-----------|---|-------------|
| Al |   |          |   |           |   |             |
| Al | 1 | 2.621338 |   |           |   |             |
| Al | 1 | 2.621322 | 2 | 89.991116 |   |             |
| Al | 2 | 2.621358 | 1 | 90.009419 | 3 | -0.052503   |
| Ca | 2 | 3.044021 | 1 | 64.698093 | 3 | 61.725206   |
| N  | 3 | 4.024255 | 1 | 77.538868 | 2 | 77.489364   |
| H  | 6 | 1.014960 | 3 | 57.541082 | 1 | 61.599598   |
| H  | 6 | 1.014769 | 3 | 93.362402 | 1 | -46.301161  |
| H  | 6 | 1.014957 | 3 | 57.631509 | 1 | -154.185705 |

(D) Na<sub>2</sub>Al<sub>4</sub>...H<sub>2</sub>O

|    |   |          |   |            |   |            |
|----|---|----------|---|------------|---|------------|
| Al |   |          |   |            |   |            |
| Al | 1 | 2.625599 |   |            |   |            |
| Al | 1 | 2.629529 | 2 | 89.988202  |   |            |
| Al | 3 | 2.625557 | 1 | 89.999533  | 2 | 0.000470   |
| Ca | 3 | 3.035381 | 1 | 64.336425  | 2 | -61.848036 |
| O  | 4 | 3.940804 | 3 | 73.654375  | 1 | 69.693747  |
| H  | 6 | 0.962782 | 4 | 32.785719  | 3 | -39.438945 |
| H  | 6 | 0.961124 | 4 | 127.177662 | 3 | 9.425782   |

(E) Na<sub>2</sub>Al<sub>4</sub>...HF

|    |   |          |   |           |   |            |
|----|---|----------|---|-----------|---|------------|
| Al |   |          |   |           |   |            |
| Al | 1 | 2.630068 |   |           |   |            |
| Al | 1 | 2.630033 | 2 | 90.007309 |   |            |
| Al | 3 | 2.630353 | 1 | 90.000760 | 2 | 0.000452   |
| Ca | 1 | 3.041568 | 2 | 64.385553 | 4 | -61.350709 |
| F  | 1 | 3.935014 | 2 | 70.572192 | 4 | 69.306355  |
| H  | 1 | 3.152671 | 2 | 65.423548 | 4 | 62.749689  |

# Supplementary Material (ESI) for New Journal of Chemistry

# This journal is © The Royal Society of Chemistry and

# The Centre National de la Recherche Scientifique, 2005

(F) Na<sub>2</sub>Al<sub>4</sub>...HCl

|    |   |          |   |           |   |            |
|----|---|----------|---|-----------|---|------------|
| Al |   |          |   |           |   |            |
| Al | 1 | 2.627426 |   |           |   |            |
| Al | 1 | 2.627413 | 2 | 90.007683 |   |            |
| Al | 3 | 2.627585 | 1 | 89.996558 | 2 | 0.001417   |
| Ca | 4 | 3.043314 | 3 | 64.455507 | 1 | -61.444404 |
| Cl | 4 | 4.354371 | 3 | 72.458199 | 1 | 71.566386  |
| H  | 1 | 3.242911 | 2 | 66.116535 | 4 | 63.709702  |

(G) Na<sub>2</sub>Al<sub>4</sub>...HBr

|    |   |          |   |           |   |            |
|----|---|----------|---|-----------|---|------------|
| Al |   |          |   |           |   |            |
| Al | 1 | 2.627687 |   |           |   |            |
| Al | 1 | 2.627739 | 2 | 89.993966 |   |            |
| Al | 2 | 2.627391 | 1 | 90.000599 | 3 | -0.000022  |
| Ca | 1 | 3.044951 | 2 | 64.465585 | 4 | -61.458660 |
| Br | 2 | 4.431149 | 1 | 72.753143 | 3 | -71.920669 |
| H  | 1 | 3.185825 | 2 | 65.961407 | 4 | 63.414026  |
